# Supplementary material for: A full-parameter unidirectional metamaterial cloak for microwaves
Source: Springer Nature journal article supplement (doi:10.1038/nmat3476), 2012-11-11
Supplement: nmat3476-s1.pdf [file nmat3476-s1.pdf]

Browse Articles
| Nature Materials


Skip to main content

Thank you for visiting nature.com. You are using a browser version with limited support for CSS. To obtain
the best experience, we recommend you use a more up to date browser (or turn off compatibility mode in
Internet Explorer). In the meantime, to ensure continued support, we are displaying the site without styles
and JavaScript.

Advertisement


- View all journals
- Search
- Log in

- Explore content
- About the journal
- Publish with us

- Sign up for alerts
- RSS feed


1. nature
2. nature materials
3. browse articles

# Browse Articles

## Filter By:

Article Type

All

- All
- Article (1901)
- Author Correction (53)
- Comment (38)
- Commentary (136)
- Correspondence (64)
- Corrigendum (51)
- Editorial (267)
- Erratum (42)
- Feature (29)
- Interview (52)
- Letter (1115)
- Milestones (23)
- News & Views (1595)
- Perspective (39)
- Progress Article (31)
- Publisher Correction (43)
- Research Briefing (23)
- Research Highlights (328)
- Research News (50)
- Review Article (154)

Year

All

- All
- 2024 (120)
- 2023 (299)
- 2022 (276)
- 2021 (307)
- 2020 (290)
- 2019 (306)
- 2018 (275)
- 2017 (222)
- 2016 (302)
- 2015 (336)
- 2014 (334)
- 2013 (302)
- 2012 (311)
- 2011 (279)
- 2010 (290)
- 2009 (253)
- 2008 (252)
- 2007 (272)
- 2006 (255)
- 2005 (246)

- ### On-device phase engineering

  A strategy of on-device phase engineering of two-dimensional materials is proposed, allowing the in situ realization of various lattice phases with distinct stoichiometries and versatile functions.

  - Xiaowei Liu
  - Junjie Shan
  - Feng Miao

  Article25 Apr 2024
- ### Evolution of the flat band and the role of lattice relaxations in twisted bilayer graphene

  By combining nano-spot angle-resolved photoemission spectroscopy and atomic force microscopy, the authors resolve the fine electronic structure of the flat band and remote bands of twisted bilayer graphene as the twist angle varies, revealing a spectral weight transfer between remote bands that is attributed to lattice relaxations.

  - Qian Li
  - Hongyun Zhang
  - Shuyun Zhou

  Article24 Apr 2024
- ### Elementary excitations of single-photon emitters in hexagonal boron nitride

  Combining resonant inelastic X-ray scattering and photoluminescence spectroscopy, an elementary excitation in hexagonal-boron-nitride-based single-photon emitters has been demonstrated, giving rise to multiple regular harmonics that can explain the wide frequency range of these emitters.

  - Jonathan Pelliciari
  - Enrique Mejia
  - Gabriele Grosso

  Article23 Apr 2024
- ### Observation of giant non-reciprocal charge transport from quantum Hall states in a topological insulator

  The authors report diode-like resistance in a non-magnetic topological insulator in the quantum Hall regime.

  - Chunfeng Li
  - Rui Wang
  - Fengqi Song

  Article19 Apr 2024
- ### Understanding asymmetric switching times in accumulation mode organic electrochemical transistors

  The turn-off time is generally faster than the turn-on time in accumulation mode organic electrochemical transistors (OECTs), but the mechanism is less understood. Here the authors find different transient behaviours of turn-on and turn-off in accumulation mode OECTs, and ion transport is the limiting factor of device kinetics.

  - Jiajie Guo
  - Shinya E. Chen
  - David S. Ginger

  Article17 Apr 2024
- ### Uncovering the predictive pathways of lithium and sodium interchange in layered oxides

  Ion exchange is a powerful method to access metastable materials for energy storage, but identifying lithium and sodium interchange in layered oxides remains challenging. Using such model materials, vacancy level and corresponding lithium preference are shown to be crucial for ion exchange pathway accessibility.

  - Yu Han
  - Weihang Xie
  - Chong Liu

  Article16 Apr 2024
- ### Manipulating chiral spin transport with ferroelectric polarization

  The authors report a modulation of the magnon spin current by electric polarization reversal.

  - Xiaoxi Huang
  - Xianzhe Chen
  - Ramamoorthy Ramesh

  Article15 Apr 2024
- ### Experimental observation of current-driven antiskyrmion sliding in stripe domains

  Electric current pulses are used to move antiskyrmions, by coupling them with a helical track.

  - Zhidong He
  - Zhuolin Li
  - Baogen Shen

  Article11 Apr 2024
- ### Harnessing instability for work hardening in multi-principal element alloys

  Harnessing premature necking produces a rapid multiplication of dislocations to interact with local chemical orders for work hardening in VCoNi alloy, achieving ductility of 20% and yield strength of 2 GPa during room-temperature and cryogenic deformation.

  - Bowen Xu
  - Huichao Duan
  - Xiaolei Wu

  ArticleOpen Access11 Apr 2024
- ### A correlated ferromagnetic polar metal by design

  The authors report coexisting ferromagnetism, polar distortion and metallicity in quasi-two-dimensional Ca3Co3O8, providing a platform to exploit magnetoelectric coupling in a metallic system.

  - Jianbing Zhang
  - Shengchun Shen
  - Pu Yu

  Article11 Apr 2024
- ### Drift-free iontronic sensing enabled by a creep-free polyelectrolyte elastomer

  Soft pressure sensors drift under prolonged high stress because of the creep of soft materials, which causes inaccurate measurements. Now, through molecular-level design, a leakage-free and creep-free polyelectrolyte elastomer is synthesized, and an iontronic sensor using the polyelectrolyte elastomer shows very low signal drift under a high static pressure.

  Research Briefing10 Apr 2024
- ### A DNA origami device spatially controls CD95 signalling to induce immune tolerance in rheumatoid arthritis

  A pH-responsive DNA origami device displays a precise geometric array of CD95 ligands to selectively induce activated immune cell death and elicit localized immune tolerance to alleviate rheumatoid arthritis.

  - Ling Li
  - Jue Yin
  - Xiaoyuan Chen

  Article09 Apr 2024
- ### Solution-phase sample-averaged single-particle spectroscopy of quantum emitters with femtosecond resolution

  Combining fluorescence correlation spectroscopy and ultrafast spectroscopy, the sample-averaged dynamics of defects are studied with single-particle sensitivity in two-dimensional hexagonal boron nitride heterogeneous emitters.

  - Jiaojian Shi
  - Yuejun Shen
  - Aaron M. Lindenberg

  Article08 Apr 2024
- ### 1T′-transition metal dichalcogenide monolayers stabilized on 4H-Au nanowires for ultrasensitive SERS detection

  High-phase-purity and stable 1T′-transition metal dichalcogenide monolayers are grown on 4H-Au nanowires by a facile and rapid wet-chemical method, enabling ultrasensitive surface-enhanced Raman scattering detection.

  - Zijian Li
  - Li Zhai
  - Hua Zhang

  Article08 Apr 2024
- ### Ferroelastically protected reversible orthorhombic to monoclinic-like phase transition in ZrO2 nanocrystals

  Ferroelectric phase stability is a pivotal challenge for fluorite-structure ferroelectrics. Using electron microscopy, a ferroelastically protected reversible polar-to-non-polar phase transition in ZrO2 is observed and the critical strain state to break the reversibility is measured.

  - Xinyan Li
  - Zhuohui Liu
  - Lin Gu

  Article08 Apr 2024
- ### Goosebumps drive microstructures

  Light-driven artificial goosebumps enable the simple yet precise actuation of microstructures.

  - Jaeil Kim
  - Hoon Eui Jeong

  News & Views03 Apr 2024
- ### A deeper understanding

  The scientific community has become more aware of issues surrounding reproducibility. We should remain cognizant that as we develop better understanding we can revise our knowledge of a problem and scientific findings that are considered valid today might not be in the future.

  Editorial03 Apr 2024
- ### “The unreasonable effectiveness of mathematics” in evading polaritonic losses

  Polaritonic losses, a root impediment to the many bounties of nanophotonics, may be evaded by resorting to the mathematics of synthetic frequencies offering ‘virtual’ gain.

  - Dmitri N. Basov
  - Michael M. Fogler

  News & Views03 Apr 2024
- ### Identifying single spin defects in gallium nitride

  Single spin defects are identified in gallium nitride at room temperature, exhibiting a spin readout contrast of up to 30%.

  - Jin-Shi Xu
  - Chuan-Feng Li

  News & Views03 Apr 2024
- ### Efficient blue emitter with a hoop

  Highly efficient matrix-free hyperfluorescent organic light-emitting diodes are constructed with remarkably supressed Dexter transfer utilizing narrowband blue emitters encapsulated with hopped alkyl chains.

  - Yuewei Zhang
  - Lian Duan

  News & Views03 Apr 2024

- Previous page
- page 1
- page 2
- page 3
- …
- page 306
- Next page

## Explore content

- Research articles
- Reviews & Analysis
- News & Comment
- Current issue
- Collections
- Subjects

- Follow us on Facebook
- Follow us on Twitter
- Sign up for alerts
- RSS feed


## About the journal

- Aims & Scope
- Our publishing models
- Journal Information
- Journal Metrics
- About the Editors
- Research Cross-Journal Editorial Team
- Reviews Cross-Journal Editorial Team
- Editorial Values Statement
- Editorial Policies
- Content Types
- Web Feeds
- Contact


## Publish with us

- Submission Guidelines
- For Reviewers
- Language editing services
- Submit manuscript

## Search

Search articles by subject, keyword or author

Show results from

All journals
This journal

Search

Advanced search

### Quick links

- Explore articles by subject
- Find a job
- Guide to authors
- Editorial policies

Nature Materials (*Nat. Mater.*)

ISSN 1476-4660 (online)

ISSN 1476-1122 (print)

## nature.com sitemap

### About Nature Portfolio

- About us
- Press releases
- Press office
- Contact us

### Discover content

- Journals A-Z
- Articles by subject
- protocols.io
- Nature Index

### Publishing policies

- Nature portfolio policies
- Open access

### Author & Researcher services

- Reprints & permissions
- Research data
- Language editing
- Scientific editing
- Nature Masterclasses
- Research Solutions

### Libraries & institutions

- Librarian service & tools
- Librarian portal
- Open research
- Recommend to library

### Advertising & partnerships

- Advertising
- Partnerships & Services
- Media kits
- Branded
  content

### Professional development

- Nature Careers
- Nature 
  Conferences

### Regional websites

- Nature Africa
- Nature China
- Nature India
- Nature Italy
- Nature Japan
- Nature Middle East

- Privacy
  Policy
- Use
  of cookies
- Your privacy choices/Manage cookies
- Legal
  notice
- Accessibility
  statement
- Terms & Conditions
- Your US state privacy rights

© 2024 Springer Nature Limited

xml version="1.0" encoding="UTF-8"?
